# Supplementary material for: SARS-CoV-2 hijacks neutralizing dimeric IgA for enhanced nasal infection and injury
Source: Research Square preprint supplement (doi:10.21203/rs.3.rs-923755/v1), 2021-10-05
Supplement: Supplementary file 1 [file 272091212b67e08e39a49a68.pdf]

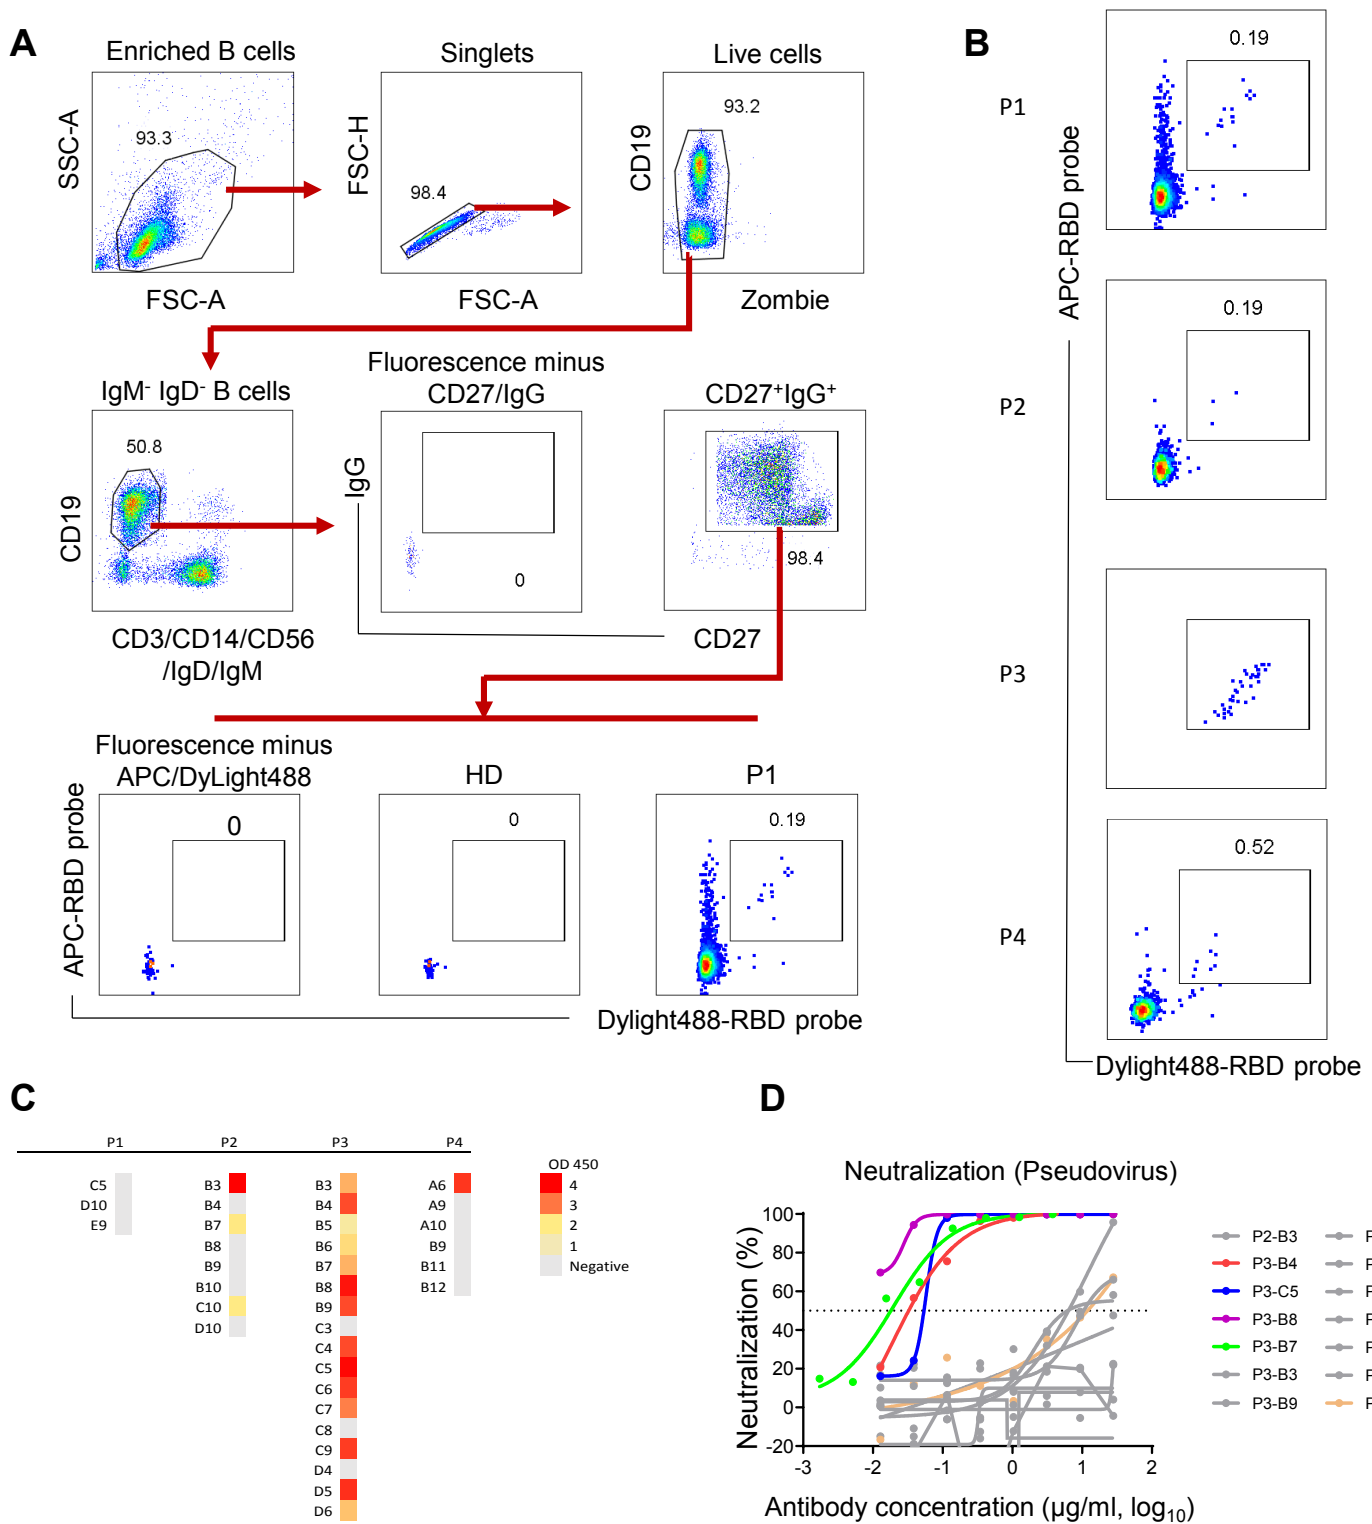

**Supplementary Fig. 1. Isolation of SARS-CoV-2 specific antibodies from sorted memory B cells.**

**(A)** The gating strategy for isolation of SARS-CoV-2 RBD-specific memory B cells by flow cytometry.

**(B)** The RBD double positive cell population was obtained from each subject.

**(C)** RBD-binding response of individual monoclonal antibodies from 4 subjects by ELISA. The colour scale indicated the absorbance value at OD450 nm.

**(D)** Neutralization activity was determined for screened antibodies against SARS-CoV-2 pseudovirus. The HuNAbs with high neutralizations were color-coded.

**A**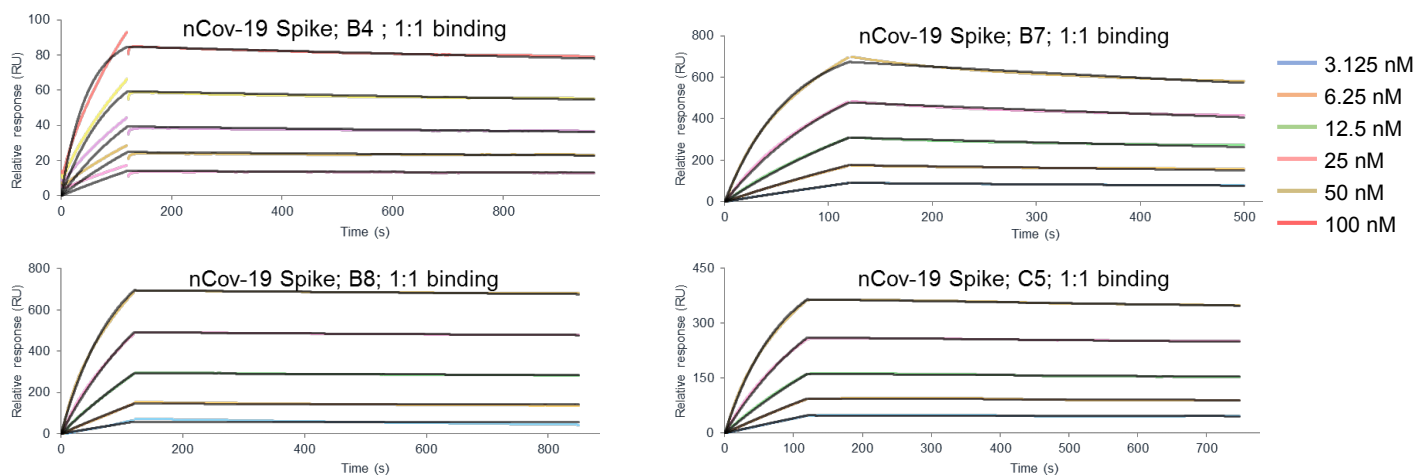**B**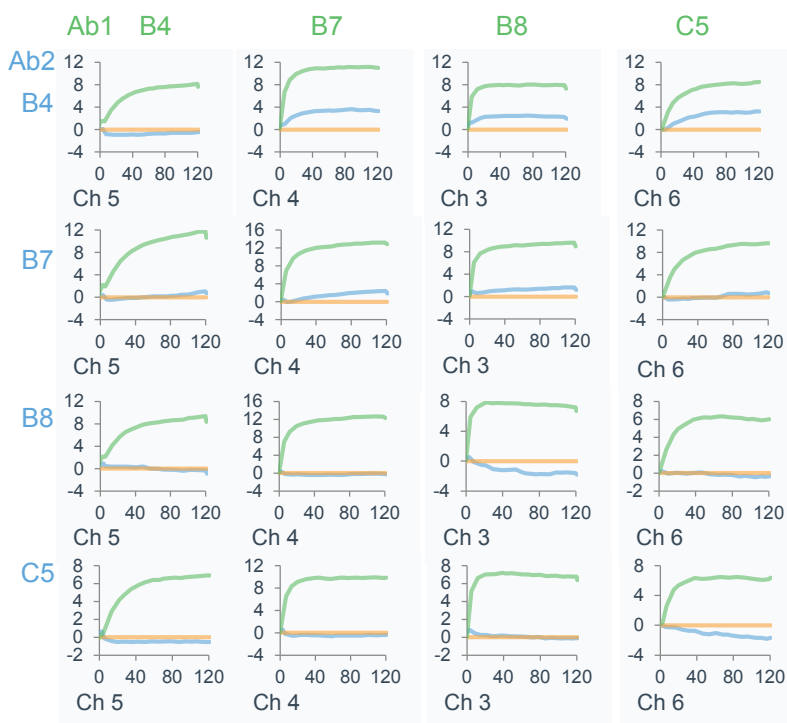**C**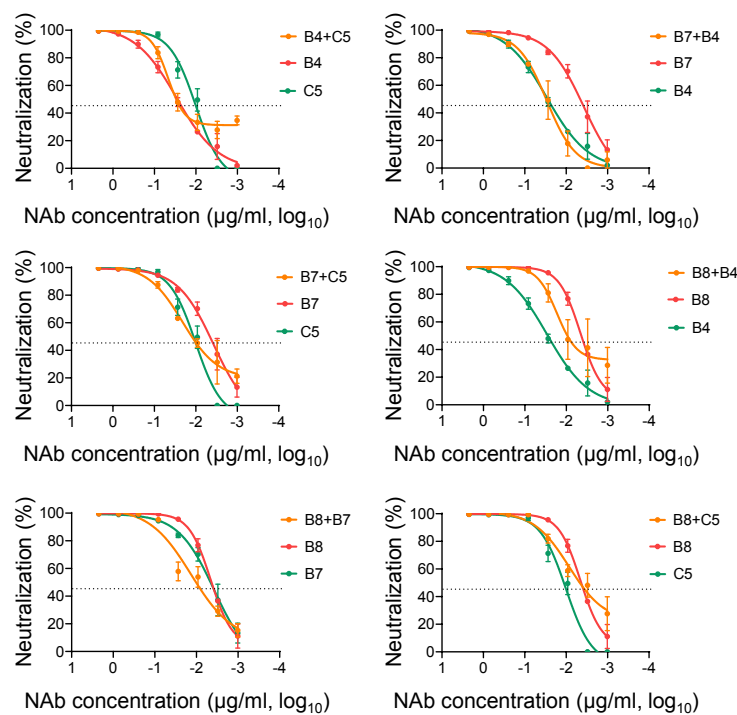

### Supplementary Fig. 2. Characterization of purified HuNABs *in vitro*.

**(A)** The binding dynamics of four most potent HuNABs (B4, B7, B8 and C4) to SARS-CoV-2 Spike glycoprotein.

**(B)** The competitive binding between these four HuNABs to SARS-CoV-2 RBD. Orange curve: the baseline; Green curve: the binding of test antibody to RBD; Blue Curve: the binding of test antibody (Ab1) to RBD after pre-incubation with the competitor antibody (Ab2).

**(C)** Lack of synergistic effect between pairs of these four HuNABs by neutralization assay against the SARS-CoV-2 pseudovirus. The combined antibodies were mixed at 1:1 ratio.

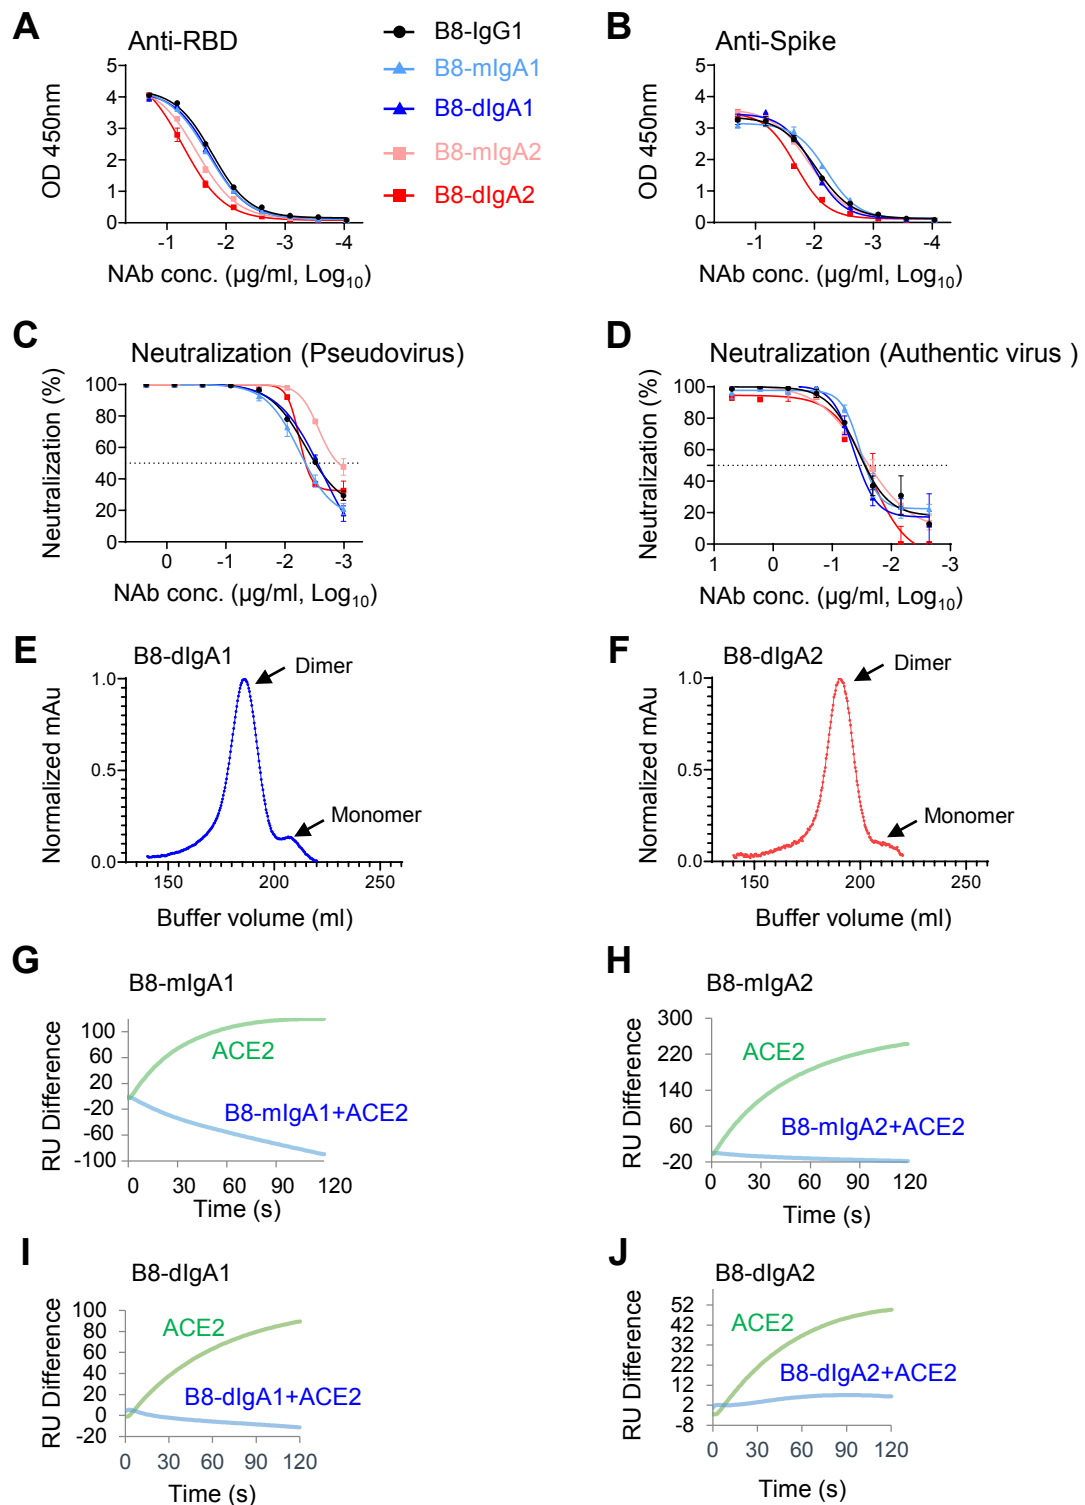

### Supplementary Fig. 3. Characterization of B8-based IgA NAb.

(A) RBD-specific binding activities of B8-mIgA1, B8-mIgA1, B8-dlgA1 and B8-dlgA2 as compared to B8-IgG1 measured by ELISA. (B) Spike-specific binding activities of B8-mIgA1, B8-mIgA1, B8-dlgA1 and B8-dlgA2 as compared to B8-IgG1 measured by ELISA. (C) Neutralization activities of B8-mIgA1, B8-mIgA1, B8-dlgA1 and B8-dlgA2 as compared to B8-IgG1 measured by decreased pseudotyped SARS-CoV-2 infection in HEK 293T-ACE2 cells. (D) Neutralization activities of B8-mIgA1, B8-mIgA1, B8-dlgA1 and B8-dlgA2 as compared to B8-IgG1 measured by decreased authentic SARS-CoV-2 infection in Vero-E6 cells. All the assays above (A-D) were performed in duplicates and the mean of the duplicates was shown with SEM. The antibody concentration in the x-axis is shown in log-transformed units. (E) The purity of dimeric B8-dlgA1 was confirmed by size exclusion chromatography (SEC). (F) The purity of dimeric B8-dlgA2 was confirmed by SEC. (G-J) The curves show binding of ACE2 to SARS-CoV-2 RBD with (blue) or without (blue) pre-incubation with B8-mIgA1, B8-mIgA2, B8-dlgA1, and B8-dlgA2, respectively, as measured by SPR.



**A**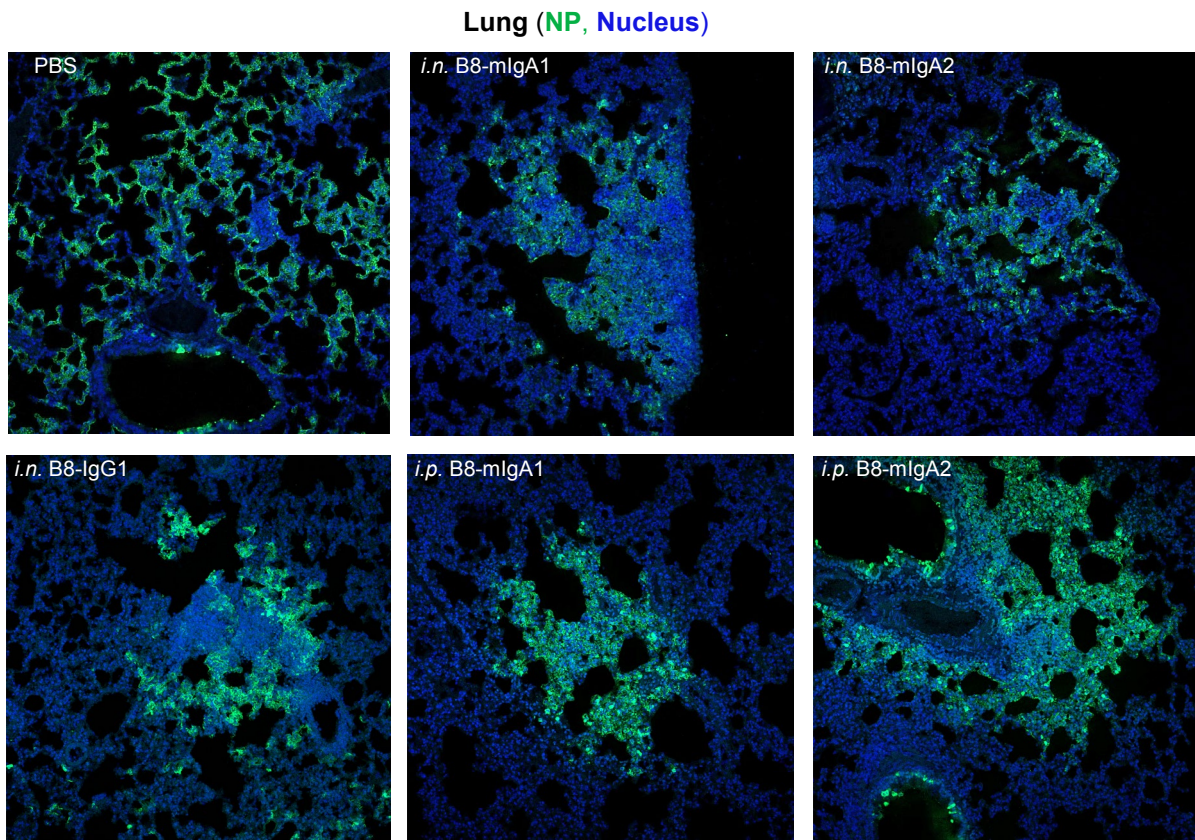**B**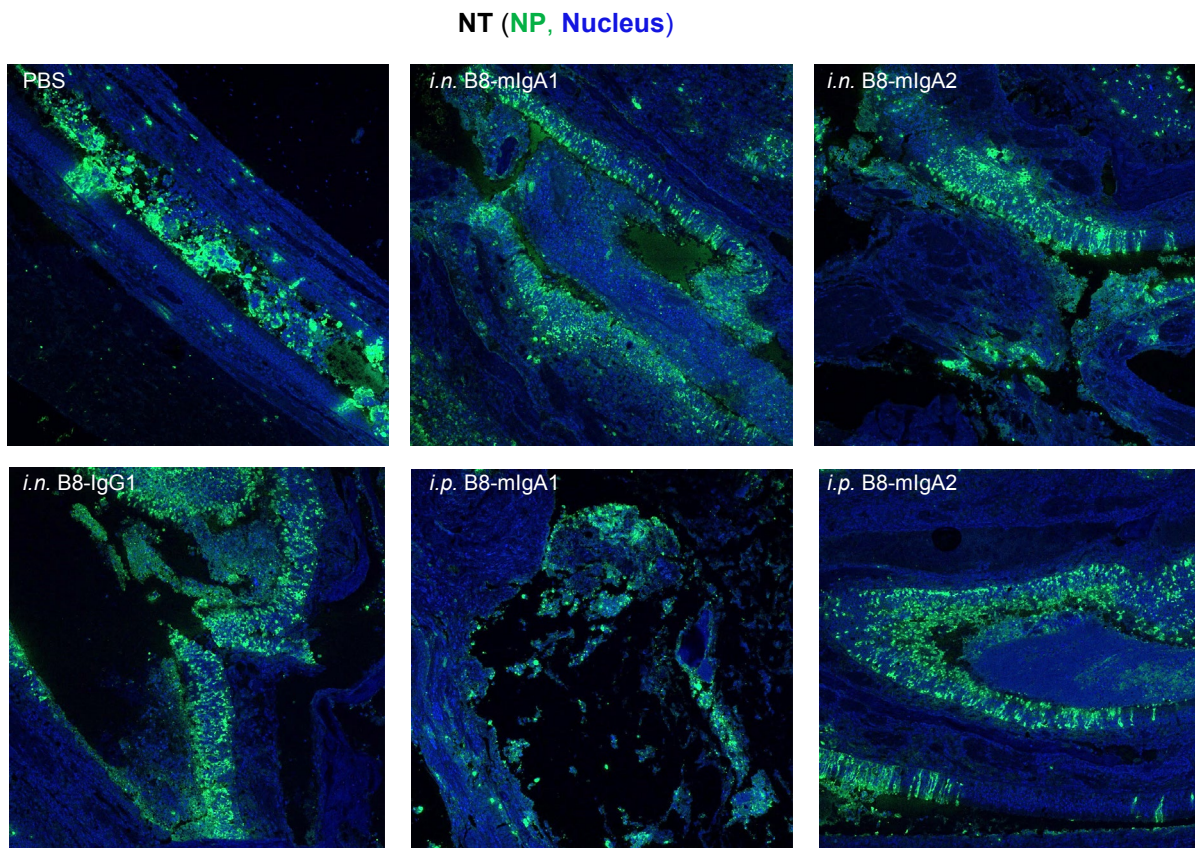

**Supplementary Fig. 4. SARS-CoV-2 infection at 4 dpi in both lung and NT of infected Syrian hamsters pre-treated with B8-mlgA1 or B8-mlgA2 by confocal microscope.**

**(A-B)** Representative images (100×) of infected foci in lungs **(A)** and NT **(B)** from each group as determined by anti-NP immunofluorescence (IF) staining. The SARS-CoV-2 NP and cell nuclei were stained with rabbit anti-SARS-CoV-2 NP (green) and DAPI (blue), respectively.



**A**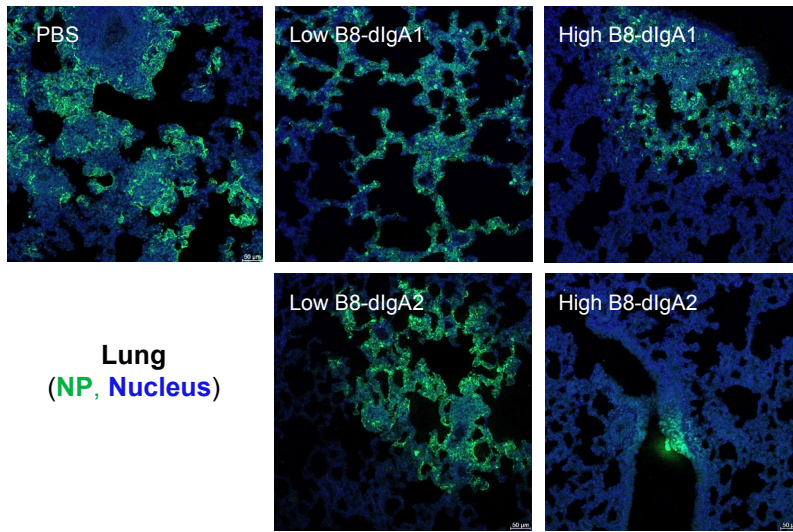**B**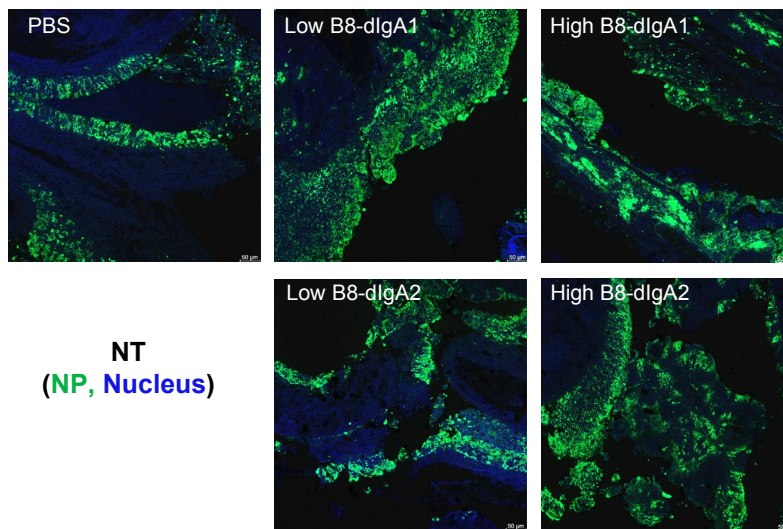**C**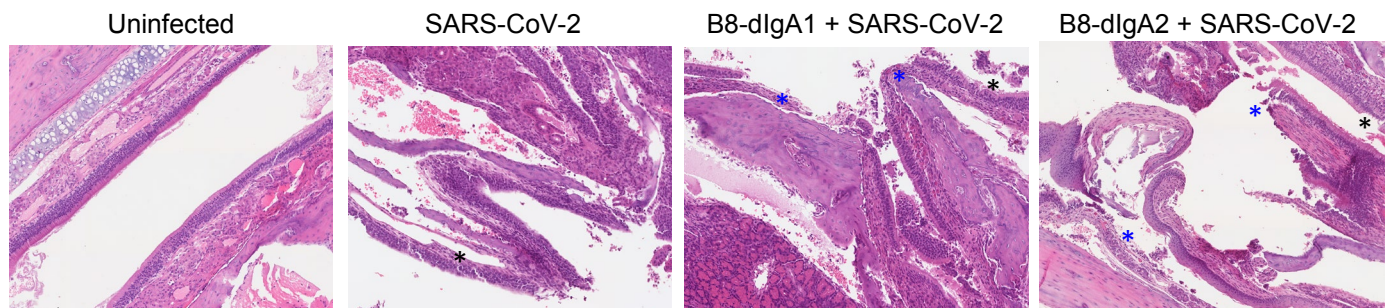**D**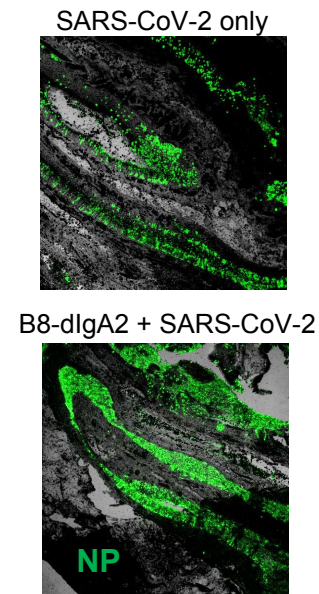**E**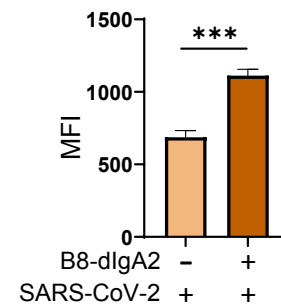

**Supplementary Fig. 5. SARS-CoV-2 infection at 4 dpi in both lung and NT of infected Syrian hamsters pre-treated with B8-dlgA1 or B8-dlgA2 by confocal and HE microscope.** (A-B) Representative images (100×) of infected foci in lungs (A) and NT (B) from each group as determined by anti-NP immunofluorescence (IF) staining. The SARS-CoV-2 NP and cell nuclei were stained with rabbit anti-SARS-CoV-2 NP (green) and DAPI (blue), respectively. (C) SARS-CoV-2 infection results in more extensive and severe damage of the NT epithelium in B8-dlgA-administrated animals (10× HE images). Injury of the NT epithelium is extensive with partial (black asterisk) or complete (blue asterisk) desquamation in B8-dlgA1- and B8-dlgA2-pretreated Syrian hamsters. (D) Density of NP-positive cells in NT epithelium during live SARS-CoV-2 infection (50× images). (E) Analysis of NP-positive MFI in 10 random NP-positive areas. Statistics were generated using the student *t* test. \**p*<0.05; \*\**p*<0.01; \*\*\**p*<0.001.

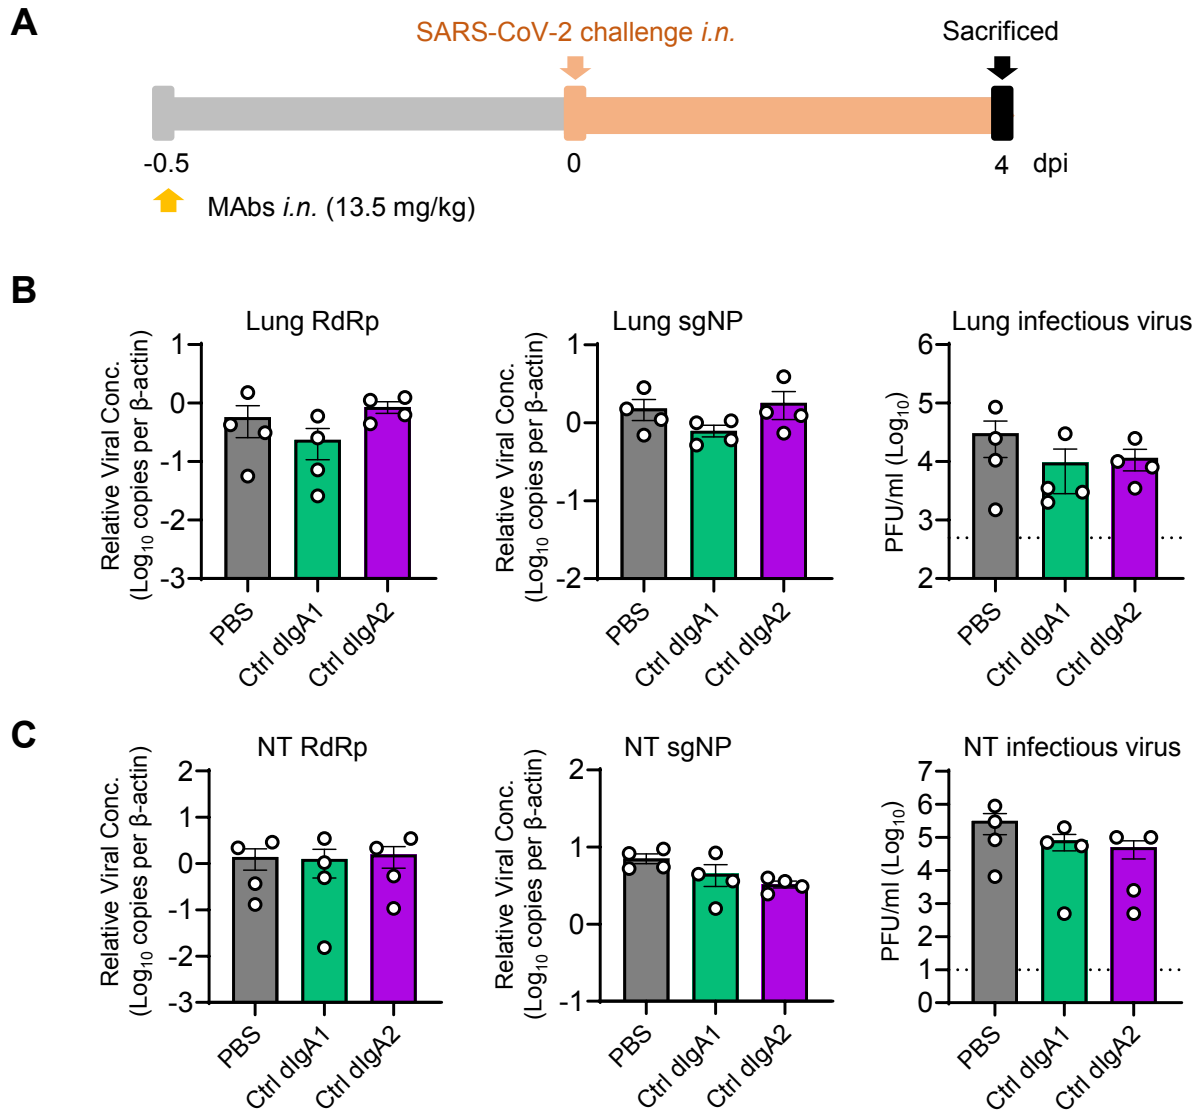

**Supplementary Fig. 6. Control dlga1 or dlga2 did not mediate enhancement of SARS-CoV-2 infection in NT.**

**(A)** Experiment schedule. Two groups of hamsters (n=4 per group) were inoculated intranasally with control dlga1 and control dlga2 at a high dose of 13.5 mg/kg 12 hours before intranasal viral challenge, respectively. Another group of hamsters (n=4) received PBS as control. On day 0, each hamster was intranasally challenged with a dose of 10<sup>5</sup> PFU of SARS-CoV-2 as mentioned in Figure 5A. All hamsters were sacrificed on 4 dpi for analysis.

**(B)** The viral loads in lung were determined by three assays.

**(C)** The viral loads in NT were determined by three assays.

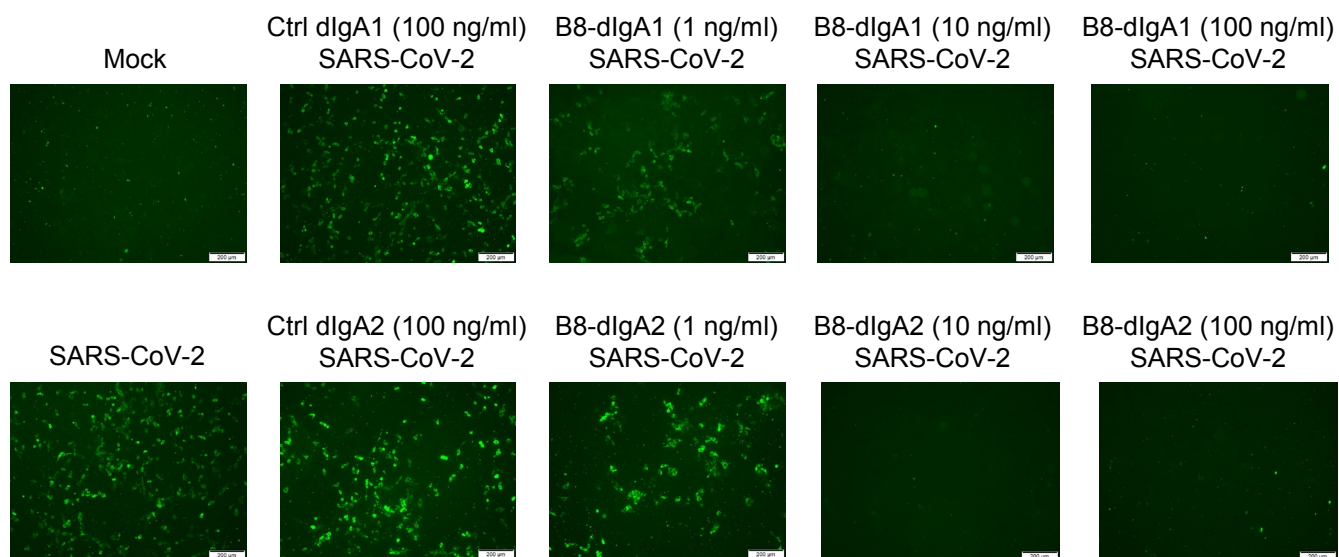

**Supplementary Fig. 7. Potent neutralization of live SARS-CoV-2 infection by B8-dIgA1 and B8-IgA2 in human kidney cell line HK-2.**

The IF staining of SARS-CoV-2 NP (in green) in infected HK-2 cells pre-treated with different dose of antibody as indicated. The representative image of each group was shown. Scale bars represent 200  $\mu$ m.



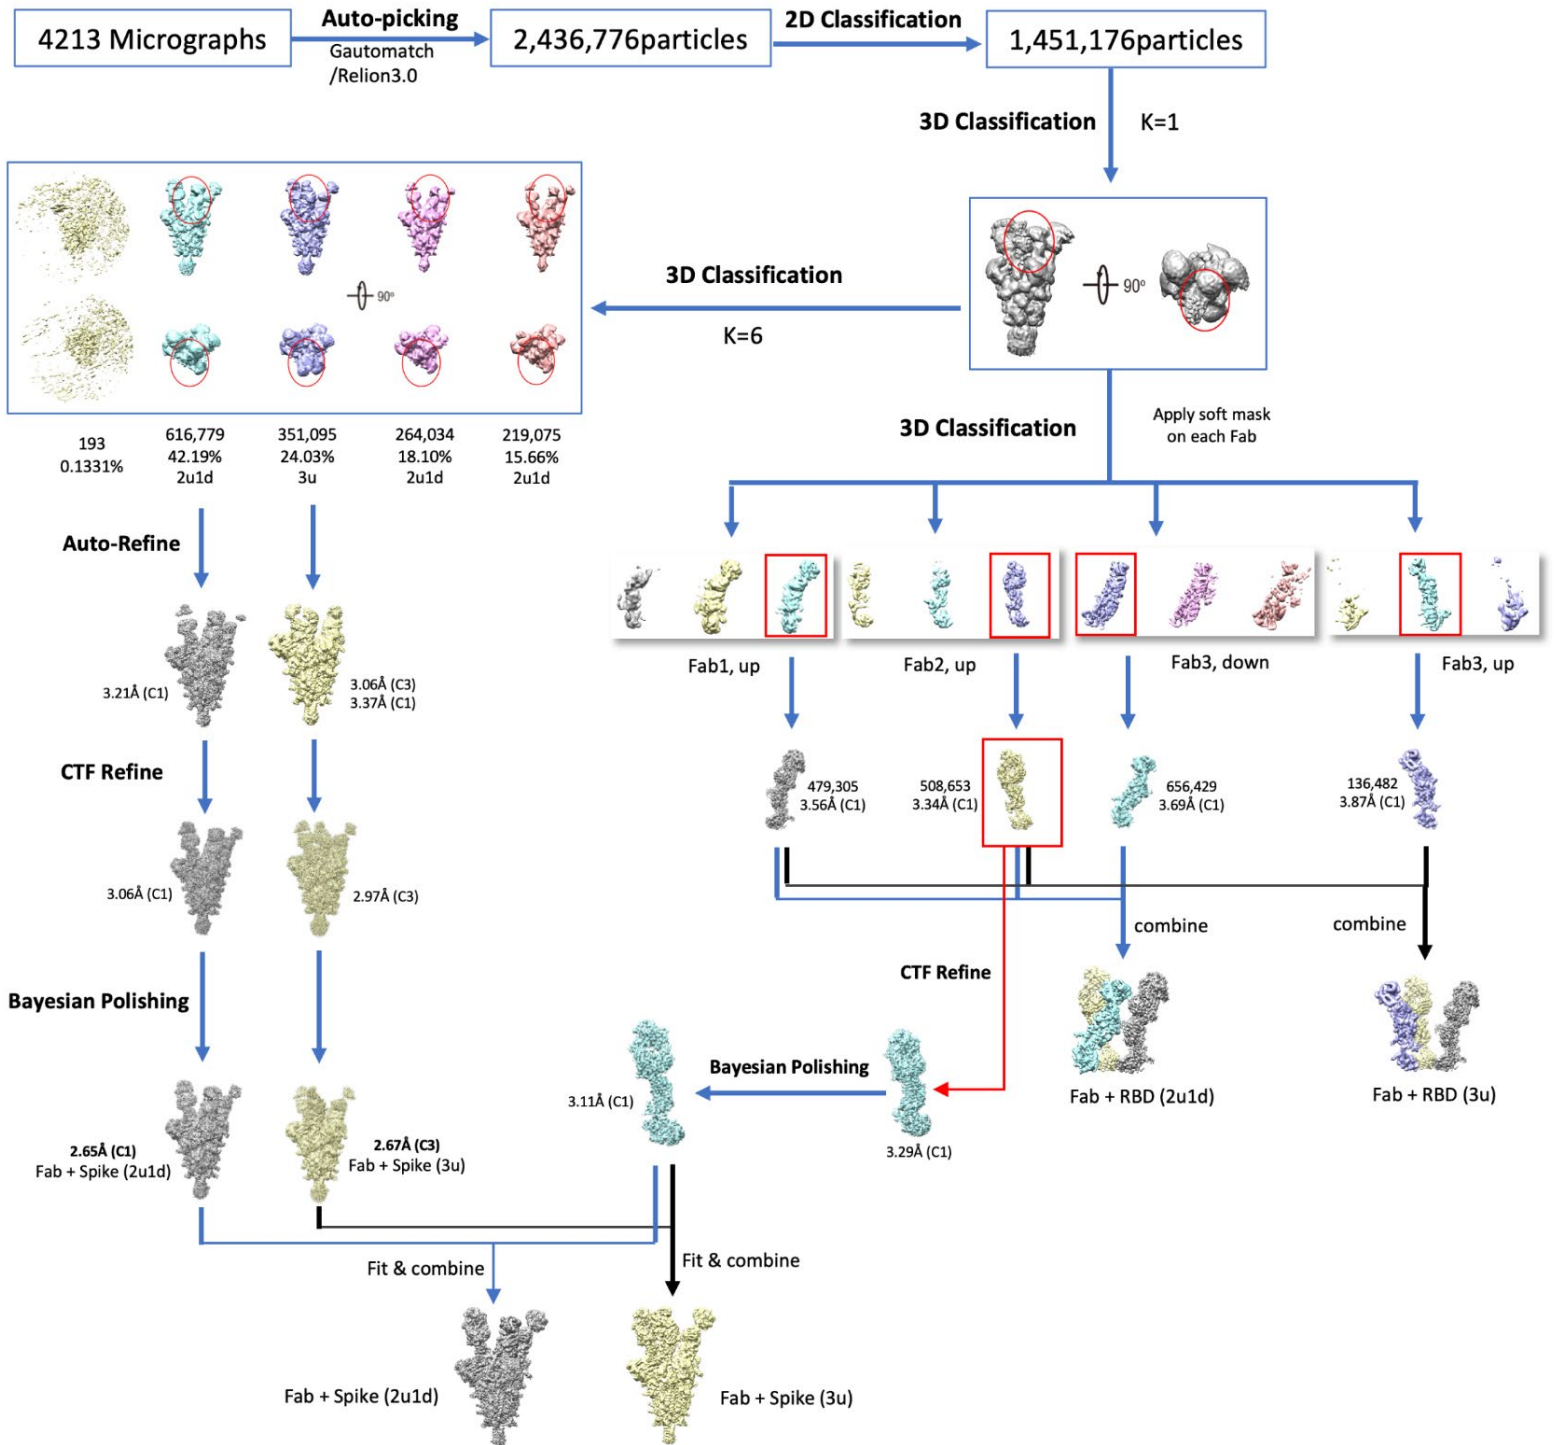

**Supplementary Fig. 8. A flow-chart of SARS-CoV-2 S-B8 complex cryo-EM data processing.** Different map density of RBD-Fab portions were emphasized in red cycle.



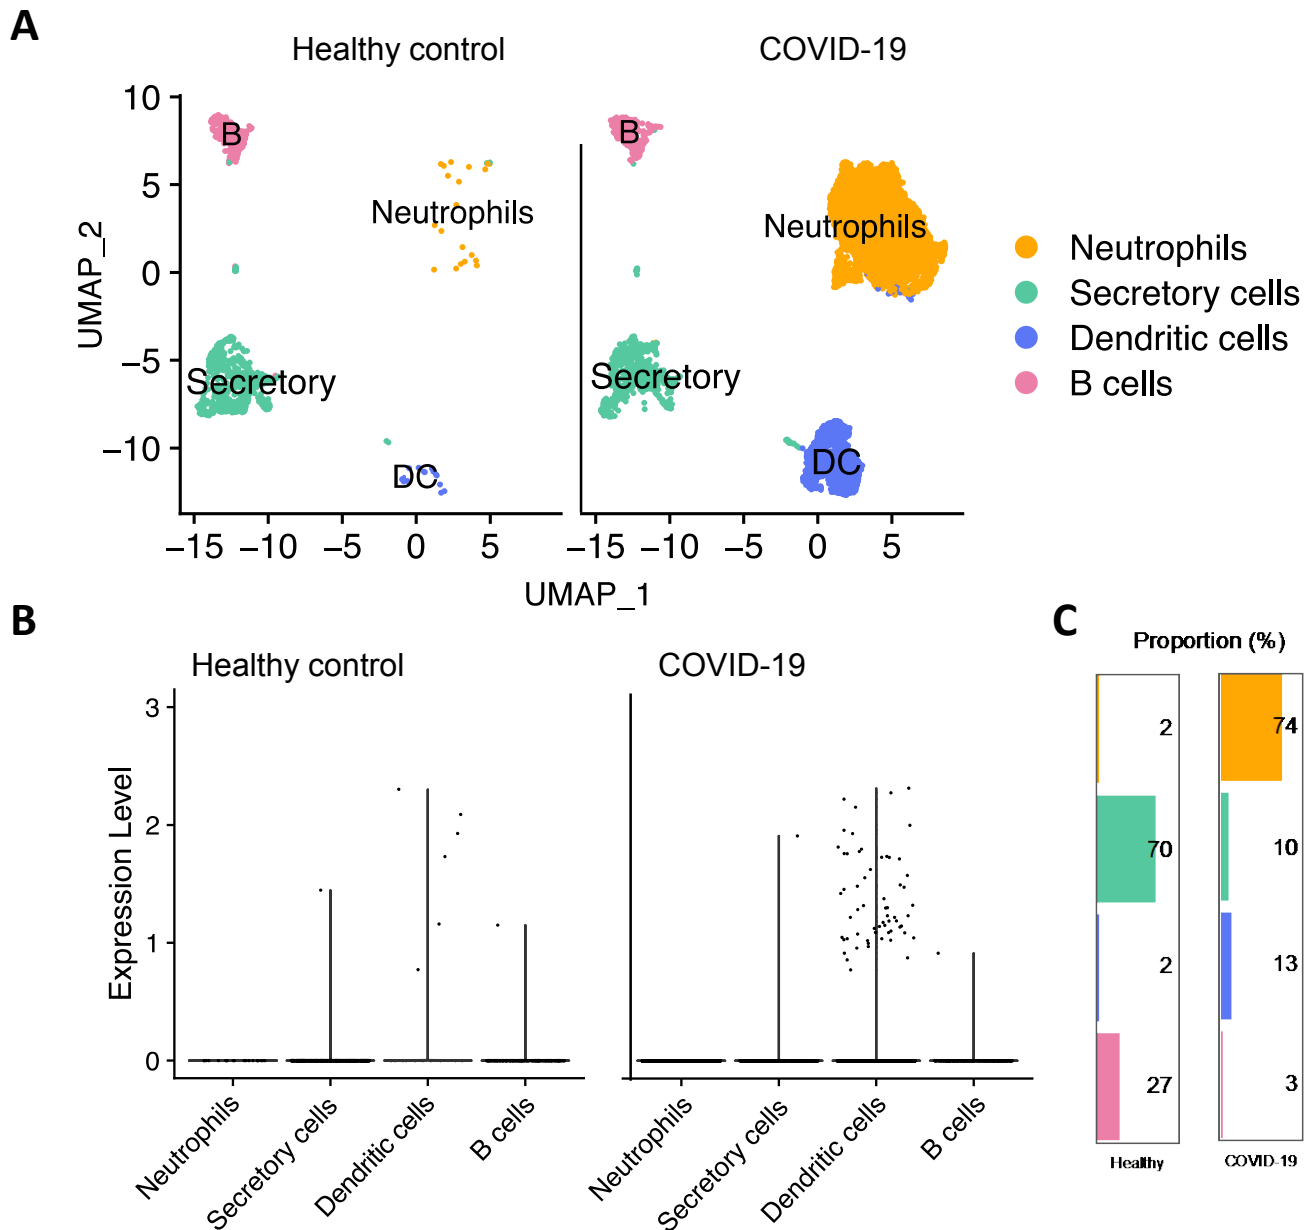

**Supplementary Fig. 9. Preliminary analysis of the human nasal cytology data.**

**(A)** The analysis was based data submitted under accession code GSE171488 (healthy donor nasal brushing) and GSE164547 (COVID-19 patient nasal brushing). Among CD14 positive cells, the neutrophil and monocyte-differentiated DCs were mainly increased in the nasal cytology samples of COVID-19 patients.

**(B)** Increased CD209 expression on nasal DCs of COVID-19 patients.

**(C)** The proportion of nasal DCs increased 6.5-fold from 2% to 13% in nasal samples compared between health and COVID-19 subjects.

Supplementary Table 1. Clinical characteristics of SARS-CoV-2 infected subjects.

| Patient ID | Age | Gender | Days after symptom onset<br>(or 1 <sup>st</sup> hospitalization) | Disease Severity |
|------------|-----|--------|------------------------------------------------------------------|------------------|
| P1         | 56  | F      | 114                                                              | Severe           |
| P2         | 62  | M      | 116                                                              | Severe           |
| P3         | 21  | M      | 49                                                               | Asymptomatic     |
| P4         | 75  | M      | 15                                                               | Mild             |

Supplementary Table 2. Gene family analysis of four HuNAbs.

| HuNAbs | Heavy chain                 |          |             |         | Light chain                  |          |             |         |
|--------|-----------------------------|----------|-------------|---------|------------------------------|----------|-------------|---------|
|        | IGHV                        | IGHJ     | CDR3 length | SHM (%) | IGKV                         | IGKJ     | CDR3 length | SHM (%) |
| B4     | IGHV3-66*01,<br>IGHV3-66*04 | IGHJ6*02 | 12          | 3.8     | IGKV1-33*01,<br>IGKV1D-33*01 | IGKJ5*01 | 9           | 4.6     |
| B7     | IGHV1-69*18                 | IGHJ6*02 | 18          | 0.0     | IGKV3-11*01                  | IGKJ2*01 | 9           | 0.7     |
| B8     | IGHV1-69*18                 | IGHJ6*02 | 14          | 4.8     | IGKV3-11*01                  | IGKJ4*01 | 9           | 1.7     |
| C5     | IGHV1-69*18                 | IGHJ4*02 | 16          | 2.4     | IGKV3-20*01                  | IGKJ1*01 | 9           | 2.8     |

Supplementary Table 3. Binding ability of HuNAbs to SARS-CoV-2 RBD and spike.

| HuNAbs | SARS-CoV-2 RBD           | SARS-CoV-2 spike         |
|--------|--------------------------|--------------------------|
|        | EC <sub>50</sub> (μg/ml) | EC <sub>50</sub> (μg/ml) |
| A6     | 0.30                     | 17.94                    |
| B4     | 0.06                     | 0.06                     |
| B7     | 0.04                     | 0.018                    |
| B8     | 0.02                     | 0.02                     |
| C5     | 0.03                     | 0.03                     |

Supplementary Table 4. Neutralization capability of RBD-specific HuNAbs.

| HuNAbs | Pseudovirus              |                          | Live virus               |                          |
|--------|--------------------------|--------------------------|--------------------------|--------------------------|
|        | IC <sub>50</sub> (µg/ml) | IC <sub>90</sub> (µg/ml) | IC <sub>50</sub> (µg/ml) | IC <sub>90</sub> (µg/ml) |
| B4     | 0.029                    | 0.136                    | 0.048                    | 0.134                    |
| B7     | 0.015                    | 0.094                    | 0.030                    | 0.060                    |
| B8     | 0.0095                   | 0.046                    | 0.013                    | 0.032                    |
| C5     | 0.038                    | 0.083                    | 0.024                    | 0.044                    |

Supplementary Table 5. Surface plasmon resonance analysis of RBD-specific HuNAbs.

| Antigen | Analyte | Kinetics model | ka (1/Ms) | kd (1/s) | KD (M)   | tc       |
|---------|---------|----------------|-----------|----------|----------|----------|
| Spike   | B4      | 1:1            | 2.11e+05  | 9.85e-05 | 4.66e-10 | 1.32e+13 |
| Spike   | B7      | 1:1            | 3.28e+05  | 4.35e-04 | 1.32e-09 | 2.08e+09 |
| Spike   | B8      | 1:1            | 2.24e+05  | 3.78e-05 | 1.69e-10 | 1.42e+12 |
| Spike   | C5      | 1:1            | 2.50e+05  | 7.70e-05 | 3.08e-10 | 1.56e+09 |

Supplementary Table 6. B8-IgG1 concentrations in different compartments of hamsters.

| Group | Inoculation time (hour) | Inoculation dose (mg/Kg) | Day 0         | Day 4         |                         |                                    |
|-------|-------------------------|--------------------------|---------------|---------------|-------------------------|------------------------------------|
|       |                         |                          | Serum (ng/ml) | Serum (ng/ml) | Lung homogenate (ng/ml) | Nasal turbinate homogenate (ng/ml) |
| G1    | -24                     | <i>i.p.</i> 1.5          | 4257 ± 1517   | 2101 ± 1039   | 128.5 ± 13.18           | 20.66 ± 17.53                      |
| G2    | 24                      | <i>i.p.</i> 1.5          | <i>N.A.</i>   | 4868 ± 797.8  | 238.1 ± 28.68           | 86.20 ± 18.73                      |
| G3    | 48                      | <i>i.p.</i> 1.5          | <i>N.A.</i>   | 4135 ± 1674   | 229.3 ± 47.89           | 93.82 ± 8.302                      |
| G4    | 72                      | <i>i.p.</i> 1.5          | <i>N.A.</i>   | 3252 ± 1749   | 192.4 ± 43.07           | 46.01 ± 3.934                      |

*N.A.*: Not applicable



Supplementary Table 7. Binding of B8 HuNAbs to SARS-CoV-2 RBD and spike.

| HuNAbs   | SARS-CoV-2 RBD           | SARS-CoV-2 Spike         |
|----------|--------------------------|--------------------------|
|          | EC <sub>50</sub> (µg/ml) | EC <sub>50</sub> (µg/ml) |
| B8-IgG1  | 0.02                     | 0.02                     |
| B8-mIgA1 | 0.020                    | 0.006                    |
| B8-mIgA2 | 0.031                    | 0.012                    |
| B8-dIgA1 | 0.019                    | 0.011                    |
| B8-dIgA2 | 0.054                    | 0.021                    |

Supplementary Table 8. Neutralization potency of B8 HuNAbs.

| HuNAbs   | Pseudovirus              |                          | Live virus               |                          |
|----------|--------------------------|--------------------------|--------------------------|--------------------------|
|          | IC <sub>50</sub> (µg/ml) | IC <sub>90</sub> (µg/ml) | IC <sub>50</sub> (µg/ml) | IC <sub>90</sub> (µg/ml) |
| B8-IgG1  | 0.0095                   | 0.046                    | 0.013                    | 0.032                    |
| B8-mIgA1 | 0.012                    | 0.052                    | 0.012                    | 0.018                    |
| B8-mIgA2 | 0.0057                   | 0.014                    | 0.010                    | 0.051                    |
| B8-dIgA1 | 0.0048                   | 0.033                    | 0.015                    | 0.026                    |
| B8-dIgA2 | 0.012                    | 0.021                    | 0.008                    | 0.026                    |

Supplementary Table 9. HuNAb concentration in different tissue compartments of infected hamsters.

| HuNAbs   | Inoculation time (hour) | Inoculation dose (mg/Kg) | Day 0          | Day 4         |                         |                                    |
|----------|-------------------------|--------------------------|----------------|---------------|-------------------------|------------------------------------|
|          |                         |                          | Serum (ng/ml)  | Serum (ng/ml) | Lung homogenate (ng/ml) | Nasal turbinate homogenate (ng/ml) |
| B8-mIgA1 | -24                     | <i>i.n.</i> 4.5          | 90.71 ± 11.60  | <i>U.D.</i>   | 16.54 ± 7.178           | <i>U.D.</i>                        |
|          | -24                     | <i>i.p.</i> 4.5          | 8682 ± 1749    | <i>U.D.</i>   | <i>U.D.</i>             | <i>U.D.</i>                        |
| B8-mIgA2 | -24                     | <i>i.n.</i> 4.5          | 21.36 ± 6.415  | <i>U.D.</i>   | <i>U.D.</i>             | <i>U.D.</i>                        |
|          | -24                     | <i>i.p.</i> 4.5          | 1561 ± 129.1   | <i>U.D.</i>   | <i>U.D.</i>             | <i>U.D.</i>                        |
| B8-dIgA1 | -12                     | <i>i.n.</i> 4.5          | 3.784 ± 2.081  | <i>U.D.</i>   | 85.99 ± 17.52           | <i>U.D.</i>                        |
|          | -12                     | <i>i.n.</i> 13.5         | 1.981 ± 0.2688 | <i>U.D.</i>   | 88.48 ± 23.44           | <i>U.D.</i>                        |
| B8-dIgA2 | -12                     | <i>i.n.</i> 4.5          | <i>U.D.</i>    | <i>U.D.</i>   | 6.383 ± 4.624           | <i>U.D.</i>                        |
|          | -12                     | <i>i.n.</i> 13.5         | <i>U.D.</i>    | <i>U.D.</i>   | 409.1 ± 108.0           | <i>U.D.</i>                        |

*U.D.*: undetectable

Supplementary Table 10. HuNAb concentration in different tissue compartments of naive Syrian hamsters at the time of viral challenge.

| HuNAbs   | Inoculation time (hour) | Inoculation dose (mg/Kg) | Day 0              |               |                         |                                    |
|----------|-------------------------|--------------------------|--------------------|---------------|-------------------------|------------------------------------|
|          |                         |                          | Nasal wash (ng/ml) | Serum (ng/ml) | Lung homogenate (ng/ml) | Nasal turbinate homogenate (ng/ml) |
| B8-IgG1  | -12                     | <i>i.n.</i> 4.5          | 208.6 ± 23.23      | 479.9 ± 62.53 | 24336 ± 2661            | 121.1 ± 26.38                      |
| B8-mIgA1 | -12                     | <i>i.n.</i> 4.5          | 315.9 ± 186.1      | 18.84 ± 5.802 | 18914 ± 1672            | 53.87 ± 11.14                      |
| B8-mIgA2 | -12                     | <i>i.n.</i> 4.5          | 204.1 ± 25.18      | 16.05 ± 2.515 | 32712 ± 12440           | 116.5 ± 72.62                      |
| B8-dIgA1 | -12                     | <i>i.n.</i> 4.5          | 43.18 ± 27.52      | 6.827 ± 6.520 | 4347 ± 1598             | 14.74 ± 5.448                      |
| B8-dIgA2 | -12                     | <i>i.n.</i> 4.5          | 56.79 ± 15.69      | 19.00 ± 7.562 | 28033 ± 12575           | 23.74 ± 1.445                      |

Supplementary Table 11. Statistics of cryo-EM data collection, processing and model refinement.

| Data collection                    |                         |         |         |         |         |         |
|------------------------------------|-------------------------|---------|---------|---------|---------|---------|
| EM equipment                       | Titan Krios             |         |         |         |         |         |
| Voltage (kV)                       | 300                     |         |         |         |         |         |
| Detector                           | K3 Summit               |         |         |         |         |         |
| Electron dose (e <sup>-</sup> /Å²) | 50                      |         |         |         |         |         |
| Defocus range (µm)                 | -1.0 ~ -2.0             |         |         |         |         |         |
| Pixel size (Å)                     | 1.0979                  |         |         |         |         |         |
| Reconstruction                     |                         |         |         |         |         |         |
| Software                           | Relion 3.0 & Relion 3.1 |         |         |         |         |         |
| Structure & state                  | Spike                   |         | RBD-Fab |         |         |         |
|                                    | 3u                      | 2u1d    | #1, up  | #2, up  | #3,down | #3,up   |
| Symmetry imposed                   | C3                      | C1      | C1      | C1      | C1      | C1      |
| Final particles                    | 616,779                 | 351,095 | 479,305 | 508,653 | 656,429 | 136,482 |
| Map resolution (Å)                 | 2.76                    | 2.65    | 3.56    | 3.11    | 3.69    | 3.87    |
| Atomic modeling                    |                         |         |         |         |         |         |
| Software                           | Chimera, Coot, Phenix   |         |         |         |         |         |
| R.m.s. deviations                  |                         |         |         |         |         |         |
| Bond lengths (Å)                   | 0.003                   | 0.004   | 0.004   | 0.003   | 0.003   | 0.03    |
| Bond angles (°)                    | 0.591                   | 0.601   | 0.815   | 0.683   | 0.628   | 0.794   |
| MolProbity score                   | 1.63                    | 1.72    | 2.05    | 1.86    | 2.09    | 2.29    |
| Clash score                        | 5.36                    | 6.32    | 9.99    | 7.21    | 12.05   | 17.48   |
| Poor rotamers (%)                  | 0                       | 0       | 0       | 0       | 0.19    | 0       |
| Ramachandran plot (%)              |                         |         |         |         |         |         |
| Favored                            | 95.15                   | 94.55   | 90.66   | 92.5    | 91.69   | 90.24   |
| Allowed                            | 4.85                    | 5.45    | 9.34    | 7.5     | 8.31    | 9.76    |
| Outliers                           | 0                       | 0       | 0       | 0       | 0       | 0       |



Supplementary Table 12. Contacts between SARS-CoV-2 RBD and B8 Fab (distance cutoff 4Å).

| RBD   | Heavy chain              | RBD   | Light chain |
|-------|--------------------------|-------|-------------|
| V445  | E1                       | E484  | W94         |
| G446* | K98                      | G485  | W94         |
| Y449* | N31, Y32, K98            | F486* | N93, W94    |
| N450  | N31                      | N487* | N93         |
| L452  | N31, F55, L101           | Y489* | S92, N93    |
| F456* | L104                     | T500* | T56         |
| T470  | F55                      |       |             |
| I472  | T57                      |       |             |
| V483  | N59                      |       |             |
| E484  | R50, L52, T57, N59, F103 |       |             |
| C488  | F103                     |       |             |
| Y489* | F103, L104               |       |             |
| F490  | F55, L101                |       |             |
| L492  | L101, A102               |       |             |
| Q493* | A102, L104               |       |             |
| S494  | N31, L101                |       |             |

\* ACE2 binding sites

Supplementary Table 13. Neutralization of SARS-CoV-2 variants by B8-derived HuNAbs.

| Fold change of IC50 from WT (D614G) |             | RBD-specific HuNAb |          |          |          |          |
|-------------------------------------|-------------|--------------------|----------|----------|----------|----------|
|                                     |             | B8-IgG1            | B8-mIgA1 | B8-dIgA1 | B8-mIgA2 | B8-dIgA2 |
| UK<br>(B.1.1.7)                     | UKΔ8        | -30.4              | -25.3    | -6.5     | -19      | -22.5    |
|                                     | 69-70del    | -4.5               | -0.2     | -0.3     | 0.2      | -1.5     |
|                                     | N501Y       | -3.7               | -3       | -5       | -2.3     | -3.9     |
|                                     | A570D       | 0.4                | 0.6      | 0.5      | -0.4     | -0.5     |
|                                     | P681H       | -0.1               | 0.7      | 0.5      | 0.5      | 0.6      |
|                                     | S982A       | 0.6                | 0.4      | 0.2      | 0.4      | 0        |
|                                     | D1118H      | -4.8               | -3.2     | -2.3     | -2.4     | -3       |
| SA<br>(B.1.351)                     | SAΔ9        | -71.7              | <-1000   | <-1000   | -81.8    | -549     |
|                                     | L18F        | -5.6               | -0.1     | -0.1     | -1.1     | -0.9     |
|                                     | D80A        | -4.5               | -3.3     | -1.3     | -0.3     | -0.9     |
|                                     | D215G       | -22                | -26.4    | -11.5    | -21.3    | -15.3    |
|                                     | 242-244 del | -5.2               | -0.5     | -3.2     | -0.1     | -0.9     |
|                                     | R246I       | -2.4               | -0.7     | 0.3      | 0.3      | -0.4     |
|                                     | K417N       | -1.7               | 0.5      | 0.3      | -0.2     | -1.9     |
|                                     | E484K       | -779.5             | <-1000   | <-1000   | <-1000   | <-1000   |
|                                     | N501Y       | -3.7               | -3       | -5       | -2.3     | -3.9     |
|                                     | A701V       | -0.1               | -0.4     | 0.3      | 0.7      | 0.4      |
| Others                              | G485S       | -1.3               | -1.8     | -2.1     | 0.7      | -0.6     |
|                                     | F486A       | -5.6               | 0.9      | -1       | 0.5      | -0.9     |
|                                     | T716I       | -1.3               | -3.5     | -0.9     | -13.1    | -5       |
|                                     | Y453F       | -0.6               | -5.3     | -2.3     | -0.5     | 0.8      |

Note: red, resistant; green, sensitive
